# Supplementary material for: Auxiliary ligand-directed synthesis of cadmium(ii) and zinc(ii) complexes from 1-D chains to 3-D architectures with 5-nitroisophthalate
Source: Royal Society of Chemistry journal article supplement (doi:10.1039/c1ce06268a), 2011-12-03
Supplement: c1ce06268a.pdf [file c1ce06268a.pdf]

Supporting Information for:

## **Auxiliary ligand-directed synthesis of cadmium (II) and zinc (II) complexes from 1-D chains to 3-D architectures with 5-nitroisophthalate**

**Xinyi Lu, Junwei Ye\*, Wei Li, WeitaoGong, Lijian Yang, Yuan Lin and Guiling Ning\***

*State Key Laboratory of Fine Chemicals and School of Chemical Engineering, Dalian University of Technology, 2 Linggong Road, Dalian 116012, P. R. China.*

\* *Corresponding author E-mail: junweiye@dlut.edu.cn; ninggl@dlut.edu.cn; Fax: +86-411-84986067.*

### **CAPTIONS:**

**Scheme S1.** The coordination modes of NIPH ligand.

**Fig. S2.** Thermogravimetric curve for (a) **1**, (b) **2**, (c) **3**, (d) **4**.

**Fig. S3.** Thermogravimetric curve for experimental and ion exchanged samples for **4** and **4a**.

**Fig. S4.** SEM image (a) and EDS pattern (b) of the K<sup>+</sup> exchange products for **5**. (c) X-ray powder diffraction patterns of **5**: I. ion exchanged samples. II. experimental, III. simulated.

**Table S1.** Selected bond lengths [Å] for **1** and **2**.

**Table S2.** Selected bond lengths [Å] for **3-5**.

**Table S3.** Hydrogen bonds [Å and °] for **1-5**.

### Scheme S1

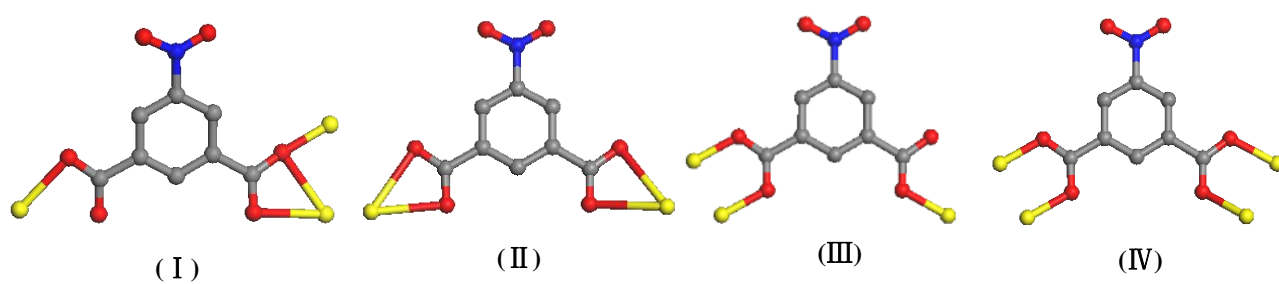

**Scheme S1.** The coordination modes of NIPH ligand.

**Figure S1.**

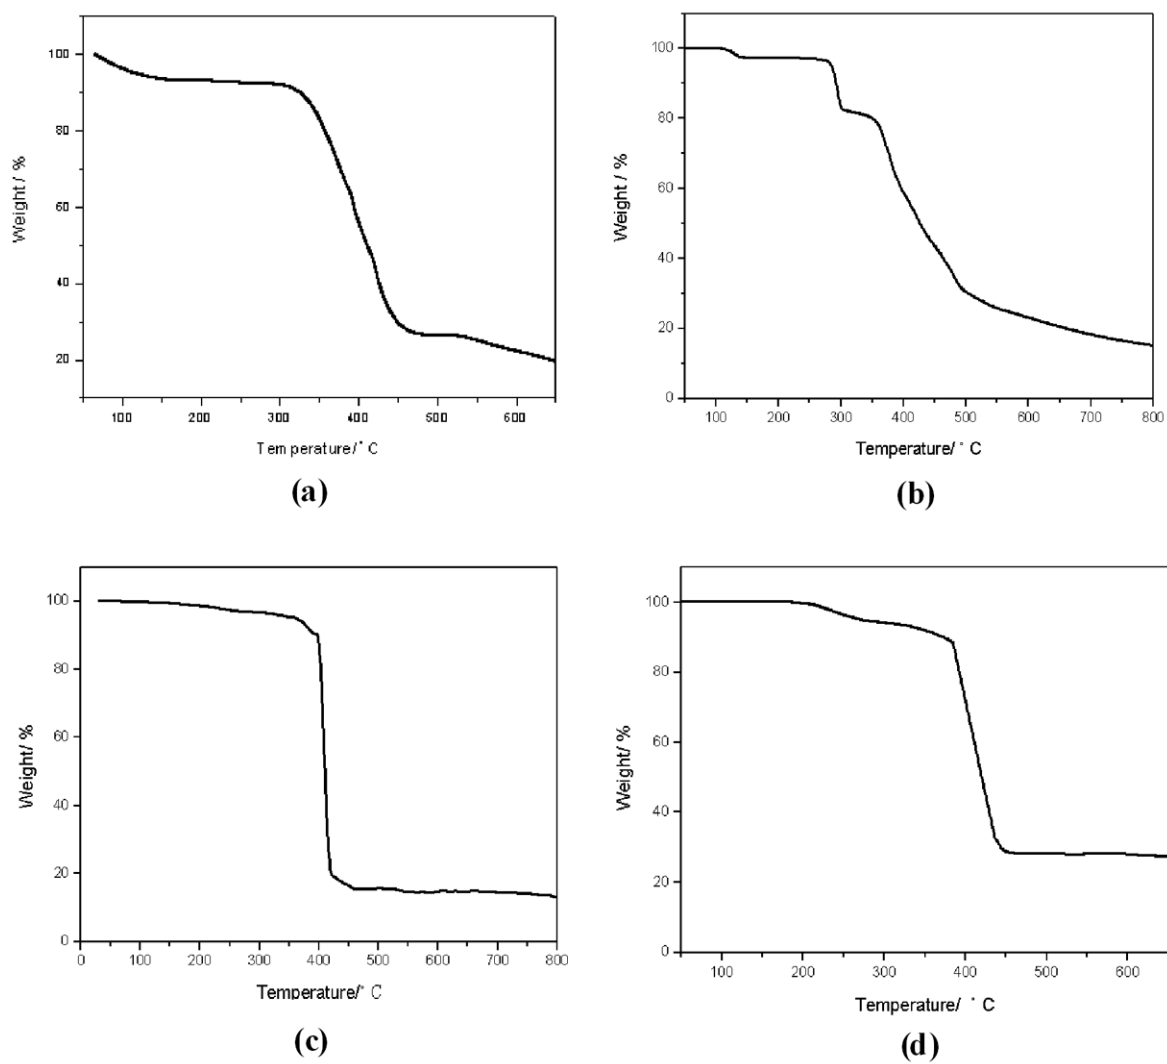

**Fig. S2.** Thermogravimetric curve for (a) **1**, (b) **2**, (c) **3**, (d) **4**.

**Figure S3**

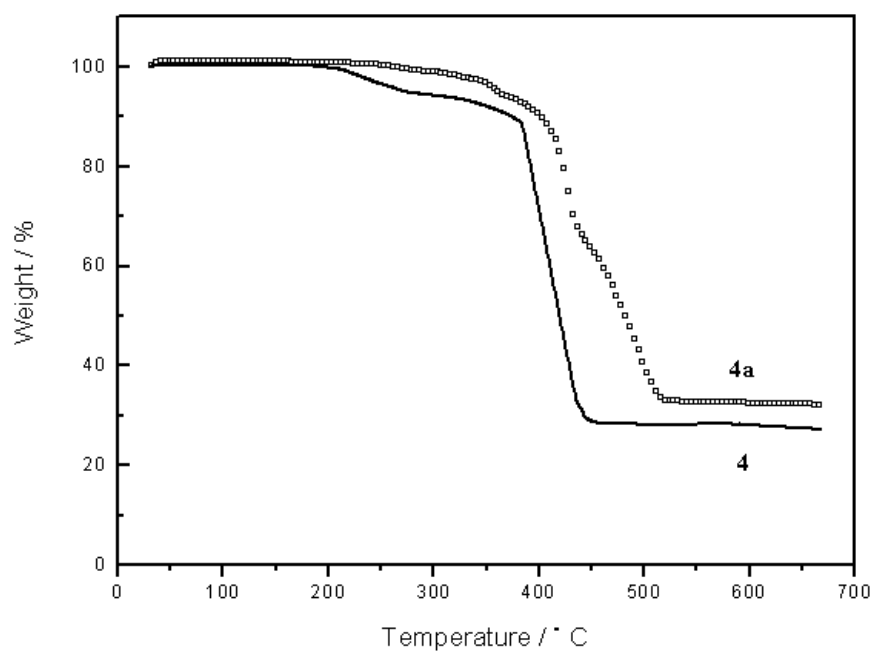

**Fig. S3.** Thermogravimetric curve for experimental and ion exchanged samples for **4** and **4a**.

**Figure S4.**

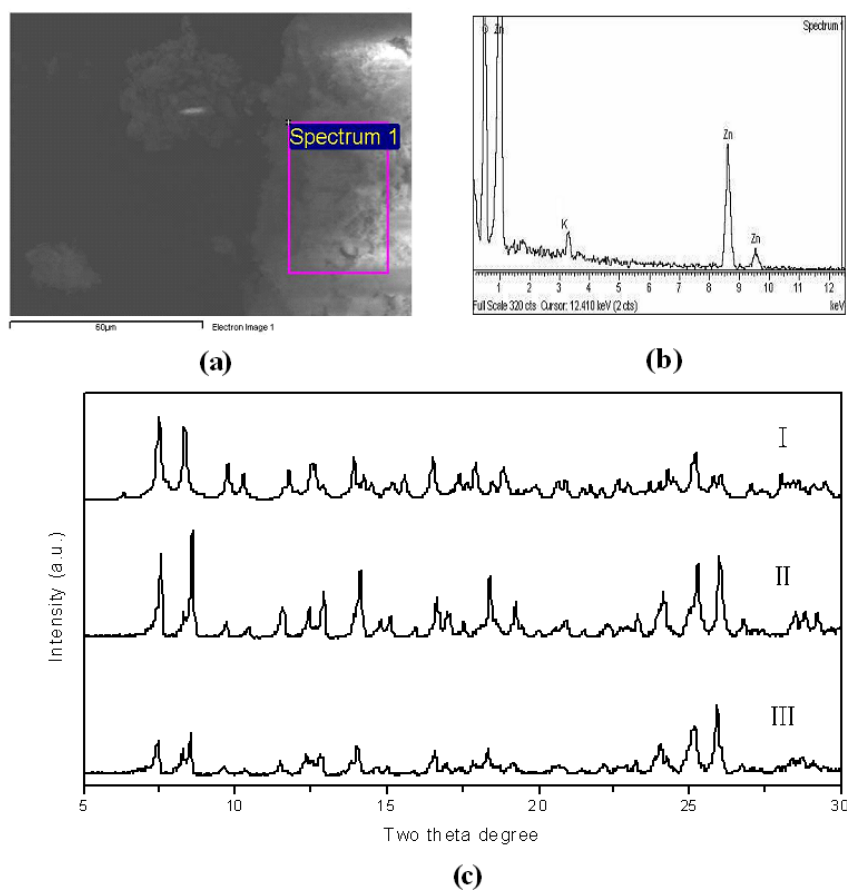

**Fig. S4.** SEM image (a) and EDS pattern (b) of the  $K^+$  exchange products for **5**. (c) X-ray powder diffraction patterns of **5**: I. ion exchanged samples. II. experimental, III. simulated.

**Table S1**

**Table S1.** Selected bond lengths [Å] for **1** and **2**.

| <b>1</b>                                    |            |                                           |            |
|---------------------------------------------|------------|-------------------------------------------|------------|
| Cd-O(4) <sup>#1</sup>                       | 2.204(2)   | Cd-O(2)                                   | 2.4701(19) |
| Cd-N(2)                                     | 2.230(2)   | Cd-O(1) <sup>#2</sup>                     | 2.5714(19) |
| Cd-O(7)                                     | 2.275(2)   | Cd-O(1)                                   | 2.3402(19) |
| Cd-O(3) <sup>#1</sup>                       | 2.794(2)   | O(4) <sup>#1</sup> -Cd-O(2)               | 135.15(8)  |
| O(4) <sup>#1</sup> -Cd-O(7)                 | 87.22(9)   | N(2)-Cd-O(2)                              | 87.67(8)   |
| N(2)-Cd-O(7)                                | 104.93(10) | O(7)-Cd-O(2)                              | 82.53(9)   |
| O(4) <sup>#1</sup> -Cd-O(1)                 | 90.70(7)   | O(1)-Cd-O(2)                              | 54.03(6)   |
| N(2)-Cd-O(1)                                | 120.64(8)  | O(4) <sup>#1</sup> -Cd-O(1) <sup>#2</sup> | 79.14(7)   |
| O(7)-Cd-O(1)                                | 111.38(9)  | N(2)-Cd-O(1) <sup>#2</sup>                | 81.59(7)   |
| O(2)-Cd-O(1) <sup>#2</sup>                  | 111.45(7)  | O(7)-Cd-O(1) <sup>#2</sup>                | 165.07(8)  |
| O(1)-Cd-O(1) <sup>#2</sup>                  | 75.13(7)   | O(4) <sup>#1</sup> -Cd-N(2)               | 137.05(8)  |
| Symmetry codes: #1 x,y,z-1, #2 -x+1,-y+2,-z |            |                                           |            |
| <b>2</b>                                    |            |                                           |            |
| Cd-O(4) <sup>#1</sup>                       | 2.2543(19) | Cd-O(1)                                   | 2.462(2)   |
| Cd-N(2)                                     | 2.308(3)   | Cd-O(3) <sup>#1</sup>                     | 2.7105(19) |
| Cd-O(2)                                     | 2.408(2)   | Cd-N(4)                                   | 2.285(2)   |
| Cd-O(7)                                     | 2.420(3)   | N(2)-Cd-O(1)                              | 92.10(8)   |
| O(4) <sup>#1</sup> -Cd-N(4)                 | 138.88(7)  | O(7)-Cd-O(1)                              | 89.00(8)   |
| O(4) <sup>#1</sup> -Cd-N(2)                 | 92.97(9)   | O(3) <sup>#1</sup> -Cd-C(7)               | 155.52(8)  |
| N(4)-Cd-N(2)                                | 91.15(9)   | O(2)-Cd-O(1)                              | 53.18(7)   |
| O(4) <sup>#1</sup> -Cd-O(2)                 | 130.90(7)  | O(7)-Cd-O(1)                              | 89.00(8)   |
| N(4)-Cd-O(2)                                | 87.90(8)   | O(4) <sup>#1</sup> -Cd-O(3) <sup>#1</sup> | 51.59(6)   |
| N(2)-Cd-O(2)                                | 101.62(9)  | N(4)-Cd-O(3) <sup>#1</sup>                | 87.53(7)   |
| O(4) <sup>#1</sup> -Cd-O(7)                 | 86.69(9)   | N(2)-Cd-O(3) <sup>#1</sup>                | 90.19(8)   |
| N(4)-Cd-O(7)                                | 88.35(9)   | O(2)-Cd-O(3) <sup>#1</sup>                | 167.42(9)  |
| N(2)-Cd-O(7)                                | 178.78(8)  | O(7)-Cd-O(3) <sup>#1</sup>                | 88.68(8)   |
| O(2)-Cd-O(7)                                | 79.48(10)  | O(1)-Cd-O(3) <sup>#1</sup>                | 131.54(6)  |
| O(4) <sup>#1</sup> -Cd-O(1)                 | 79.96(7)   | O(2)-Cd-O(1)                              | 53.18(7)   |
| N(4)-Cd-O(1)                                | 140.76(7)  |                                           |            |
| Symmetry codes: #1 x,y+1,z                  |            |                                           |            |

**Table S2**

**Table S2.** Selected bond lengths [Å] for **3-5**.

| <b>3</b>                                                      |            |                                                |            |
|---------------------------------------------------------------|------------|------------------------------------------------|------------|
| Zn(1)-O(13)                                                   | 1.9411(19) | Zn(2)-O(13)                                    | 2.092(2)   |
| Zn(1)-O(9) <sup>#1</sup>                                      | 1.945(2)   | Zn(2)-O(13) <sup>#2</sup>                      | 2.096(2)   |
| Zn(1)-O(2)                                                    | 1.985(2)   | Zn(2)-O(14)                                    | 2.266(3)   |
| Zn(1)-O(7) <sup>#2</sup>                                      | 2.001(2)   | Zn(2)-O(8)                                     | 2.082(2)   |
| Zn(2)-O(4) <sup>#3</sup>                                      | 1.989(2)   | Zn(2)-O(1) <sup>#2</sup>                       | 2.087(2)   |
| O(13)-Zn(1)-O(9) <sup>#1</sup>                                | 108.23(9)  | O(4) <sup>#3</sup> -Zn(2)-O(14)                | 80.10(10)  |
| O(13)-Zn(1)-O(2)                                              | 116.71(10) | O(8)-Zn(2)-O(14)                               | 89.73(11)  |
| O(9) <sup>#1</sup> -Zn(1)-O(2)                                | 111.53(10) | O(1) <sup>#2</sup> -Zn(2)-O(14)                | 78.63(10)  |
| O(13)-Zn(1)-O(7) <sup>#2</sup>                                | 106.71(9)  | O(13)-Zn(2)-O(14)                              | 95.96(11)  |
| O(9) <sup>#1</sup> -Zn(1)-O(7) <sup>#2</sup>                  | 115.59(10) | O(13) <sup>#2</sup> -Zn(2)-O(14)               | 172.36(9)  |
| O(2)-Zn(1)-O(7) <sup>#2</sup>                                 | 97.97(10)  | O(8)-Zn(2)-O(13)                               | 172.17(8)  |
| O(4) <sup>#3</sup> -Zn(2)-O(8)                                | 95.76(10)  | O(1) <sup>#2</sup> -Zn(2)-O(13)                | 86.66(9)   |
| O(4) <sup>#3</sup> -Zn(2)-O(1) <sup>#2</sup>                  | 158.12(9)  | O(4) <sup>#3</sup> -Zn(2)-O(13) <sup>#2</sup>  | 106.90(9)  |
| O(8)-Zn(2)-O(1) <sup>#2</sup>                                 | 89.19(10)  | O(8)-Zn(2)-O(13) <sup>#2</sup>                 | 92.56(8)   |
| O(4) <sup>#3</sup> -Zn(2)-O(13)                               | 90.54(9)   | O(1) <sup>#2</sup> -Zn(2)-O(13) <sup>#2</sup>  | 94.10(9)   |
| O(13)-Zn(2)-O(13) <sup>#2</sup>                               | 81.13(8)   |                                                |            |
| Symmetry codes: #1 -x-2,-y,-z, #2 -x-1,-y,-z, #3 -x-1,-y+1,-z |            |                                                |            |
| <b>4</b>                                                      |            |                                                |            |
| Zn(1)-O(14)                                                   | 1.9342(18) | Zn(3)-O(8) <sup>#2</sup>                       | 2.1469(16) |
| Zn(1)-O(25)                                                   | 1.9369(17) | Zn(3)-O(25) <sup>#1</sup>                      | 2.1551(18) |
| Zn(1)-O(7)                                                    | 1.9411(17) | Zn(4)-O(28) <sup>#4</sup>                      | 2.1117(17) |
| Zn(1)-O(1)                                                    | 1.9616(19) | Zn(4)-O(19)                                    | 2.1260(17) |
| Zn(2)-O(26)                                                   | 1.901(2)   | Zn(4)-O(10) <sup>#5</sup>                      | 2.1875(16) |
| Zn(2)-O(21) <sup>#1</sup>                                     | 1.9417(17) | Zn(4)-O(27)                                    | 2.054(2)   |
| Zn(2)-O(13)                                                   | 1.9587(18) | Zn(4)-O(28) <sup>#3</sup>                      | 2.0754(17) |
| Zn(2)-O(20)                                                   | 1.9707(17) | Zn(4)-O(16) <sup>#3</sup>                      | 2.1008(18) |
| Zn(3)-O(26) <sup>#1</sup>                                     | 1.985(2)   | Zn(5)-O(3) <sup>#6</sup>                       | 1.9140(18) |
| Zn(3)-O(25) <sup>#2</sup>                                     | 2.0651(17) | Zn(5)-O(28)                                    | 1.9456(17) |
| Zn(3)-O(2) <sup>#2</sup>                                      | 2.0880(19) | Zn(5)-O(9) <sup>#7</sup>                       | 1.9501(17) |
| Zn(3)-O(22)                                                   | 2.1433(17) | Zn(5)-O(15)                                    | 1.9634(18) |
| O(14)-Zn(1)-O(25)                                             | 115.58(8)  | O(25) <sup>#2</sup> -Zn(3)-O(25) <sup>#1</sup> | 81.26(7)   |
| O(14)-Zn(1)-O(7)                                              | 109.48(9)  | O(2) <sup>#2</sup> -Zn(3)-O(25) <sup>#1</sup>  | 174.67(7)  |
| O(25)-Zn(1)-O(7)                                              | 114.29(8)  | O(22)-Zn(3)-O(25) <sup>#1</sup>                | 95.84(8)   |
| O(14)-Zn(1)-O(1)                                              | 103.25(8)  | O(8) <sup>#2</sup> -Zn(3)-O(25) <sup>#1</sup>  | 88.15(7)   |

|                                                |            |                                                |           |
|------------------------------------------------|------------|------------------------------------------------|-----------|
| O(25)-Zn(1)-O(1)                               | 107.41(8)  | O(27)-Zn(4)-O(28) <sup>#3</sup>                | 168.90(8) |
| O(7)-Zn(1)-O(1)                                | 105.73(8)  | O(27)-Zn(4)-O(16) <sup>#3</sup>                | 90.71(9)  |
| O(26)-Zn(2)-O(21) <sup>#1</sup>                | 115.97(9)  | O(28) <sup>#3</sup> -Zn(4)-O(16) <sup>#3</sup> | 98.76(7)  |
| O(26)-Zn(2)-O(13)                              | 113.24(10) | O(27)-Zn(4)-O(28) <sup>#4</sup>                | 89.62(8)  |
| O(21) <sup>#1</sup> -Zn(2)-O(13)               | 111.91(8)  | O(28) <sup>#3</sup> -Zn(4)-O(28) <sup>#4</sup> | 80.30(7)  |
| O(26)-Zn(2)-O(20)                              | 98.73(9)   | O(16) <sup>#3</sup> -Zn(4)-O(28) <sup>#4</sup> | 173.30(7) |
| O(21) <sup>#1</sup> -Zn(2)-O(20)               | 111.57(8)  | O(27)-Zn(4)-O(19)                              | 100.09(8) |
| O(13)-Zn(2)-O(20)                              | 103.99(7)  | O(28) <sup>#3</sup> -Zn(4)-O(19)               | 86.44(7)  |
| O(26) <sup>#1</sup> -Zn(3)-O(25) <sup>#2</sup> | 170.04(9)  | O(16) <sup>#3</sup> -Zn(4)-O(19)               | 85.79(7)  |
| O(26) <sup>#1</sup> -Zn(3)-O(2) <sup>#2</sup>  | 95.05(9)   | O(28) <sup>#4</sup> -Zn(4)-O(19)               | 100.74(7) |
| O(25) <sup>#2</sup> -Zn(3)-O(2) <sup>#2</sup>  | 94.00(7)   | O(27)-Zn(4)-O(10) <sup>#5</sup>                | 84.36(8)  |
| O(26) <sup>#1</sup> -Zn(3)-O(22)               | 96.82(9)   | O(28) <sup>#3</sup> -Zn(4)-O(10) <sup>#5</sup> | 90.10(7)  |
| O(25) <sup>#2</sup> -Zn(3)-O(22)               | 87.88(7)   | O(16) <sup>#3</sup> -Zn(4)-O(10) <sup>#5</sup> | 88.42(7)  |
| O(2) <sup>#2</sup> -Zn(3)-O(22)                | 86.38(8)   | O(28) <sup>#4</sup> -Zn(4)-O(10) <sup>#5</sup> | 84.96(7)  |
| O(26) <sup>#2</sup> -Zn(3)-O(8) <sup>#3</sup>  | 85.58(9)   | O(19)-Zn(4)-O(10) <sup>#5</sup>                | 172.72(7) |
| O(25) <sup>#3</sup> -Zn(3)-O(8) <sup>#3</sup>  | 90.37(7)   | O(3) <sup>#6</sup> -Zn(5)-O(28)                | 106.31(8) |
| O(2) <sup>#3</sup> -Zn(3)-O(8) <sup>#3</sup>   | 89.44(8)   | O(3) <sup>#6</sup> -Zn(5)-O(9) <sup>#7</sup>   | 115.01(9) |
| O(22)-Zn(3)-O(8) <sup>#3</sup>                 | 175.35(7)  | O(28)-Zn(5)-O(9) <sup>#7</sup>                 | 106.66(8) |
| O(26) <sup>#2</sup> -Zn(3)-O(25) <sup>#2</sup> | 89.51(9)   | O(3) <sup>#6</sup> -Zn(5)-O(15)                | 111.51(9) |
| O(9) <sup>#7</sup> -Zn(5)-O(15)                | 109.08(8)  | O(28)-Zn(5)-O(15)                              | 107.91(8) |

Symmetry codes:#1 -x+1,-y,-z, #2 x-1,y,z, #3 -x+1,-y+1,-z, #4 x,y,z-1, #5 x,y+1,z-1, #6 -x+2,-y,-z+1, #7 -x+1,-y,-z+1,

## 5

|                                                |            |                                  |            |
|------------------------------------------------|------------|----------------------------------|------------|
| Zn(1)-O(26) <sup>#1</sup>                      | 1.985(3)   | Zn(3)-O(20) <sup>#6</sup>        | 1.944(3)   |
| Zn(1)-O(27) <sup>#2</sup>                      | 2.064(3)   | Zn(3)-O(13)                      | 1.959(3)   |
| Zn(1)-O(14) <sup>#2</sup>                      | 2.090(3)   | Zn(4)-O(28)                      | 2.057(3)   |
| Zn(1)-O(27) <sup>#3</sup>                      | 2.145(3)   | Zn(4)-O(25)                      | 2.069(3)   |
| Zn(1)-O(1)                                     | 2.151(3)   | Zn(4)-O(4)                       | 2.113(3)   |
| Zn(1)-O(19) <sup>#4</sup>                      | 2.153(3)   | Zn(4)-O(10)                      | 2.117(3)   |
| Zn(2)-O(26)                                    | 1.897(3)   | Zn(4)-O(28) <sup>#7</sup>        | 2.123(3)   |
| Zn(2)-O(2) <sup>#1</sup>                       | 1.946(3)   | Zn(4)-O(22)                      | 2.155(3)   |
| Zn(2)-O(7) <sup>#5</sup>                       | 1.954(3)   | Zn(5)-O(15) <sup>#8</sup>        | 1.924(3)   |
| Zn(2)-O(3)                                     | 1.976(3)   | Zn(5)-O(21)                      | 1.949(3)   |
| Zn(3)-O(8)                                     | 1.930(3)   | Zn(5)-O(28)                      | 1.952(3)   |
| Zn(3)-O(27)                                    | 1.942(3)   | Zn(5)-O(9)                       | 1.969(3)   |
| O(26) <sup>#1</sup> -Zn(1)-O(27) <sup>#2</sup> | 170.18(13) | O(8)-Zn(3)-O(13)                 | 101.82(16) |
| O(26) <sup>#1</sup> -Zn(1)-O(14) <sup>#2</sup> | 95.07(14)  | O(27)-Zn(3)-O(13)                | 106.81(14) |
| O(27) <sup>#2</sup> -Zn(1)-O(14) <sup>#2</sup> | 94.09(13)  | O(20) <sup>#6</sup> -Zn(3)-O(13) | 105.92(16) |
| O(26) <sup>#1</sup> -Zn(1)-O(27) <sup>#3</sup> | 89.93(12)  | O(28)-Zn(4)-O(25)                | 169.64(12) |
| O(27) <sup>#2</sup> -Zn(1)-O(27) <sup>#3</sup> | 80.86(12)  | O(28)-Zn(4)-O(4)                 | 86.28(12)  |
| O(14) <sup>#2</sup> -Zn(1)-O(27) <sup>#3</sup> | 174.91(13) | O(25)-Zn(4)-O(4)                 | 97.69(13)  |
| O(26) <sup>#1</sup> -Zn(1)-O(1)                | 96.71(14)  | O(28)-Zn(4)-O(10)                | 99.58(12)  |
| O(27) <sup>#2</sup> -Zn(1)-O(1)                | 87.32(13)  | O(25)-Zn(4)-O(10)                | 90.23(13)  |
| O(14) <sup>#2</sup> -Zn(1)-O(1)                | 86.61(15)  | O(4)-Zn(4)-O(10)                 | 86.51(13)  |



---

|                                                |            |                                  |            |
|------------------------------------------------|------------|----------------------------------|------------|
| O(27) <sup>#3</sup> -Zn(1)-O(1)                | 93.79(13)  | O(28)-Zn(4)-O(28) <sup>#7</sup>  | 80.36(12)  |
| O(26) <sup>#1</sup> -Zn(1)-O(19) <sup>#4</sup> | 85.67(13)  | O(25)-Zn(4)-O(28) <sup>#7</sup>  | 89.57(12)  |
| O(27) <sup>#2</sup> -Zn(1)-O(19) <sup>#4</sup> | 90.90(13)  | O(4)-Zn(4)-O(28) <sup>#7</sup>   | 98.49(12)  |
| O(14) <sup>#2</sup> -Zn(1)-O(19) <sup>#4</sup> | 89.53(14)  | O(10)-Zn(4)-O(28) <sup>#7</sup>  | 174.97(13) |
| O(27) <sup>#3</sup> -Zn(1)-O(19) <sup>#4</sup> | 89.87(12)  | O(28)-Zn(4)-O(22)                | 91.41(12)  |
| O(1)-Zn(1)-O(19) <sup>#4</sup>                 | 175.62(13) | O(25)-Zn(4)-O(22)                | 85.44(13)  |
| O(26)-Zn(2)-O(2) <sup>#1</sup>                 | 115.66(14) | O(4)-Zn(4)-O(22)                 | 174.47(13) |
| O(26)-Zn(2)-O(7) <sup>#5</sup>                 | 117.76(15) | O(10)-Zn(4)-O(22)                | 88.93(13)  |
| O(2) <sup>#1</sup> -Zn(2)-O(7) <sup>#5</sup>   | 108.93(15) | O(28) <sup>#7</sup> -Zn(4)-O(22) | 86.05(12)  |
| O(26)-Zn(2)-O(3)                               | 99.20(14)  | O(15) <sup>#8</sup> -Zn(5)-O(21) | 113.92(16) |
| O(2) <sup>#1</sup> -Zn(2)-O(3)                 | 106.75(15) | O(15) <sup>#8</sup> -Zn(5)-O(28) | 105.89(15) |
| O(7) <sup>#5</sup> -Zn(2)-O(3)                 | 107.18(14) | O(21)-Zn(5)-O(28)                | 106.61(13) |
| O(8)-Zn(3)-O(27)                               | 114.59(15) | O(15) <sup>#8</sup> -Zn(5)-O(9)  | 114.29(15) |
| O(8)-Zn(3)-O(20) <sup>#6</sup>                 | 111.60(17) | O(21)-Zn(5)-O(9)                 | 109.13(15) |
| O(27)-Zn(3)-O(20) <sup>#6</sup>                | 114.73(13) | O(28)-Zn(5)-O(9)                 | 106.38(13) |

Symmetry codes: #1 -x+1, -y-1, -z+2, #2 -x, -y, -z+2, #3 x, y-1, z, #4 x-1, y-1, z+1, #5 -x+1, -y, -z+2, #6 -x+1, -y+1, -z+1, #7 -x+1, -y, -z+1, #8 -x, -y+1, -z+1

---

**Table S3**

**Table S3.** Hydrogen bonds [ $\text{\AA}$  and  $^\circ$ ] for **1-5**.

| D-H...A                                                                                                         | d(D-H)  | d(H...A) | d(D...A) | $\angle(\text{DHA})$ |
|-----------------------------------------------------------------------------------------------------------------|---------|----------|----------|----------------------|
| <b>1</b>                                                                                                        |         |          |          |                      |
| N(3)-H(3A)...O(7)                                                                                               | 0.86    | 2.45     | 3.230(4) | 151.9                |
| N(3)-H(3A)...O(3) <sup>#1</sup>                                                                                 | 0.86    | 2.58     | 3.169(3) | 126.1                |
| N(3)-H(3B)...O(5) <sup>#2</sup>                                                                                 | 0.86    | 2.14     | 2.988(3) | 167.9                |
| O(7)-H(7A)...O(2) <sup>#3</sup>                                                                                 | 0.66(5) | 2.07(5)  | 2.714(3) | 164(5)               |
| O(8)-H(8A)...O(3) <sup>#4</sup>                                                                                 | 0.77(5) | 2.06(5)  | 2.804(4) | 162(4)               |
| O(7)-H(7B)...O(8) <sup>#5</sup>                                                                                 | 0.71(5) | 2.03(5)  | 2.723(4) | 165(5)               |
| O(8)-H(8B)...O(6) <sup>#6</sup>                                                                                 | 0.73(5) | 2.47(5)  | 3.165(4) | 161(5)               |
| Symmetry codes: #1 x,y,z-1, #2 x+1,y-1,z-1, #3 -x+2,-y+2,-z, #4 -x+1,-y+1,-z+1, #5 x+1,y+1,z-1, #6 -x,-y+2,-z+1 |         |          |          |                      |
| <b>2</b>                                                                                                        |         |          |          |                      |
| N(5)-H(5B)...O(5) <sup>#1</sup>                                                                                 | 0.86    | 2.67     | 3.079(3) | 110.7                |
| N(5)-H(5A)...O(6) <sup>#1</sup>                                                                                 | 0.77    | 2.53     | 3.147(4) | 138.8                |
| N(3)-H(3B)...O(1) <sup>#2</sup>                                                                                 | 0.79    | 2.35     | 3.060(4) | 149.9                |
| N(3)-H(3A)...O(1) <sup>#3</sup>                                                                                 | 0.85    | 2.57     | 3.306(4) | 145.0                |
| N(3)-H(3A)...O(4) <sup>#4</sup>                                                                                 | 0.85    | 2.53     | 3.142(3) | 129.6                |
| O(7)-H(7B)...O(3) <sup>#5</sup>                                                                                 | 0.59    | 2.21     | 2.756(3) | 157.1                |
| Symmetry codes: #1 x+1,y,z+1, #2 -x+1,-y+1,-z, #3 x+1,y,z, #4 x+1,y+1,z, #5 -x,-y,-z+1                          |         |          |          |                      |
| <b>3</b>                                                                                                        |         |          |          |                      |
| N(4)-H(4A)...O(10) <sup>#2</sup>                                                                                | 0.86    | 2.08     | 2.811(4) | 142.0                |
| N(4)-H(4B)...O(3) <sup>#1</sup>                                                                                 | 0.86    | 1.92     | 2.769(4) | 169.8                |
| C(18)-H(18A)...O(10) <sup>#2</sup>                                                                              | 0.93    | 1.97     | 2.778(4) | 144.8                |
| C(18)-H(18A)...O(7) <sup>#3</sup>                                                                               | 0.93    | 2.63     | 3.209(4) | 120.9                |
| C(20)-H(20A)...O(6) <sup>#4</sup>                                                                               | 0.93    | 2.63     | 3.310(6) | 130.6                |
| Symmetry codes: #1 -x-1,-y,-z, #2 -x-2,-y-1,-z+1 #3 -x-1,-y-1,-z+1, #4 -x,-y,-z+1                               |         |          |          |                      |
| <b>4</b>                                                                                                        |         |          |          |                      |
| O(28)-H(28A)...O(6)                                                                                             | 0.69(3) | 2.34(3)  | 2.986(3) | 155(3)               |
| O(27)-H(27A)...O(26)                                                                                            | 0.75(5) | 2.04(5)  | 2.786(3) | 170(5)               |
| O(25)-H(25)...O(17) <sup>#1</sup>                                                                               | 0.67(3) | 2.31(4)  | 2.916(3) | 152(4)               |
| O(27)-H(27B)...O(5) <sup>#2</sup>                                                                               | 0.76(5) | 2.19(5)  | 2.924(3) | 162(5)               |
| N(6)-H(6B)...O(24) <sup>#4</sup>                                                                                | 0.86    | 2.52     | 3.147(5) | 130.8                |
| N(5)-H(5A)...O(4) <sup>#3</sup>                                                                                 | 0.86    | 1.93     | 2.692(4) | 146.8                |
| Symmetry codes: #1 -x+1,-y+1,-z, #2 x,y,z-1, #3 -x+2,-y,-z+1, #4 -x,-y+1,-z                                     |         |          |          |                      |
| <b>5</b>                                                                                                        |         |          |          |                      |
| O(25)-H(25A)...O(17) <sup>#2</sup>                                                                              | 0.69    | 2.32     | 2.911(5) | 145.0                |

|                                    |      |      |           |       |
|------------------------------------|------|------|-----------|-------|
| O(25)-H(25A)...O(22)               | 0.69 | 2.51 | 2.867(5)  | 115.1 |
| O(25)-H(25B)...O(26)               | 0.71 | 2.08 | 2.781(5)  | 169.0 |
| O(27)-H(27A)...O(11) <sup>#1</sup> | 0.65 | 2.29 | 2.923(5)  | 166.1 |
| O(28)-H(28)...O(18)                | 0.68 | 2.34 | 2.980(5)  | 158.0 |
| N(5)-H(5A)...O(16) <sup>#3</sup>   | 0.86 | 1.93 | 2.700(8)  | 148.6 |
| N(6)-H(6A)...O(3) <sup>#2</sup>    | 0.86 | 2.55 | 3.353(8)  | 155.4 |
| N(6)-H(6B)...O(29)                 | 0.86 | 2.00 | 2.835(10) | 164.6 |
| O(29)-H(29A)...N(6)                | 0.82 | 2.71 | 2.835(10) | 90.3  |

Symmetry codes: #1 -x+1, -y, -z+2, #2 -x+1, -y, -z+1, #3 x+1,y,z

---
